# Supplementary material for: Density functional theory design of double donor dyes and electron transfer on dye/TiO2(101) composite systems for dye-sensitized solar cells
Source: Royal Society of Chemistry journal article supplement (doi:10.1039/d0ra08815c), 2021-01-01
Supplement: d0ra08815c1.pdf [file d0ra08815c1.pdf]

## Supporting Information

# Density Functional Theory Design of Double Donor Dyes and Electron Transfer on Dyes/TiO<sub>2</sub>(101) Composites Systems for Dye-Sensitized Solar Cells

Chundan Lin, Yanbing Liu, Di Shao, Guochen Wang, Huiying Xu, Changjin Shao,  
Wansong Zhang and Zhenqing Yang\*

Beijing Key Laboratory of Optical Detection Technology for Oil and Gas and College  
of Science, China University of Petroleum, Beijing 102249, P. R. China

-----

\*To whom all correspondence should be addressed.

Email: yangzhenqing@yahoo.com or yangzhq@cup.edu.cn

ORCID: +0000-0001-7453-2761

**ME101**

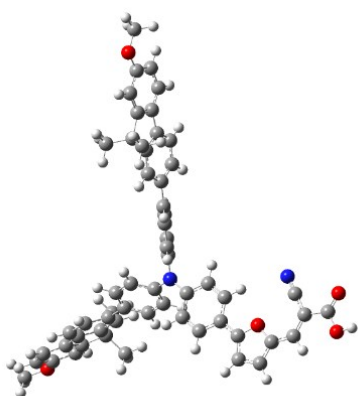

**ME102**

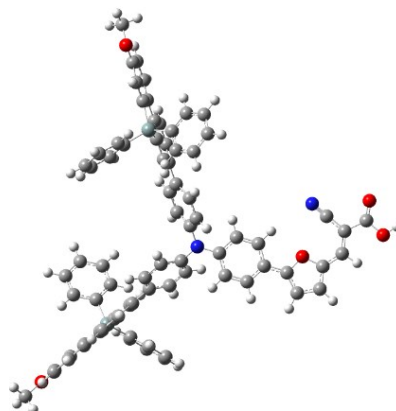

**ME103**

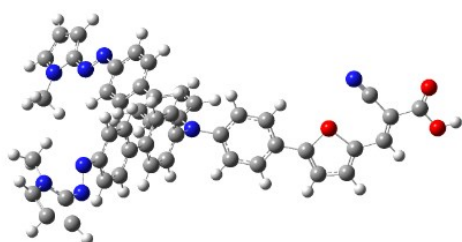

**ME104**

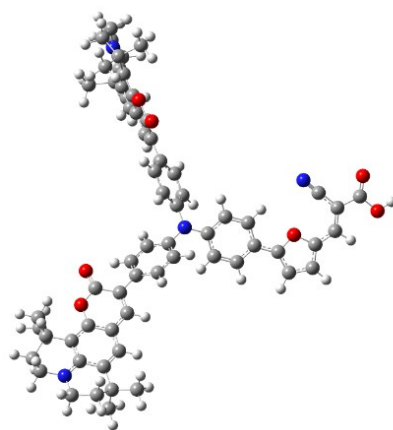

**ME105**

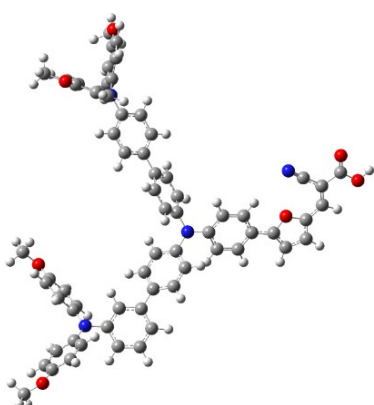

**ME106**

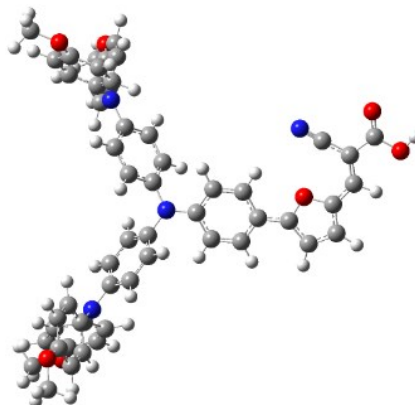

**WD8**

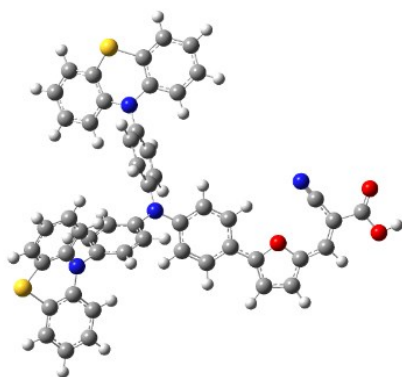

Fig. S1. The optimized structures of **ME101-ME106** and **WD8**. Gray, red, yellow, blue, purple, and white spheres represent C, O, S, N, Si and H atoms, respectively

---

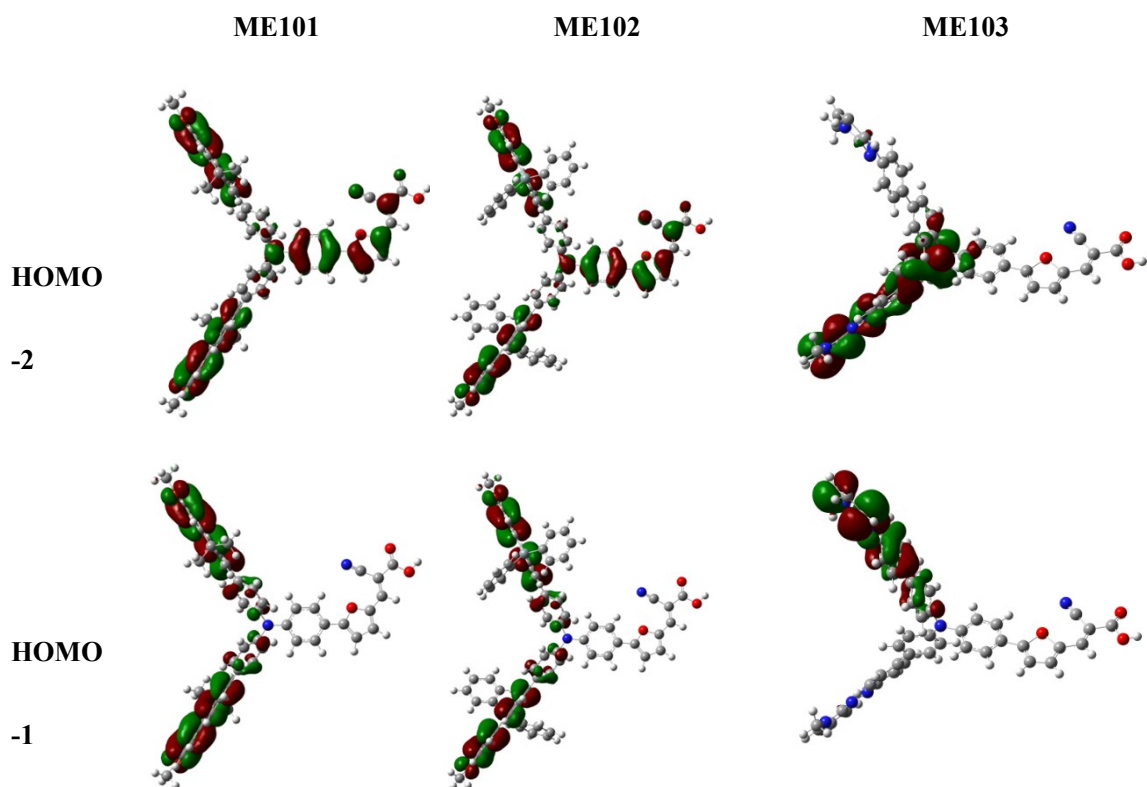

HOMO

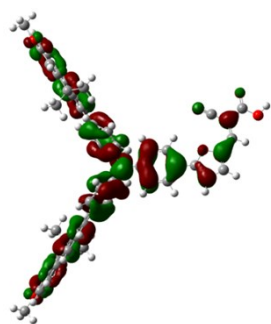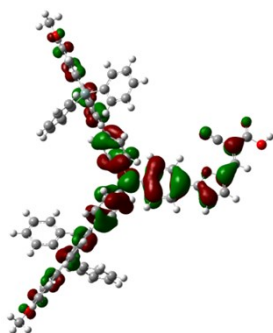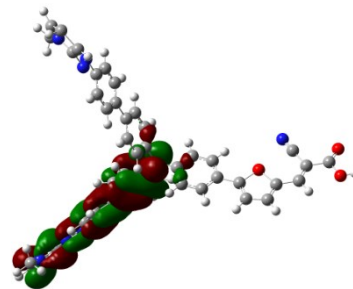

LUMO

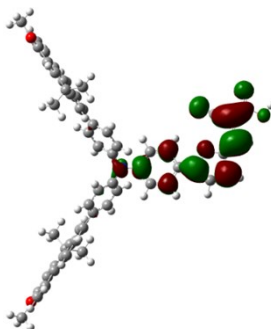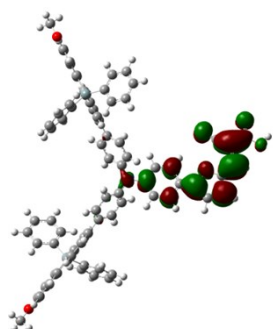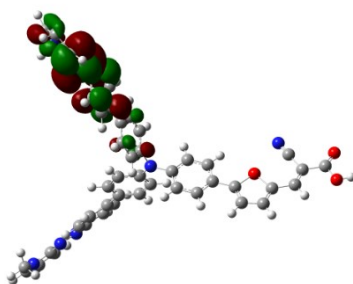

LUMO

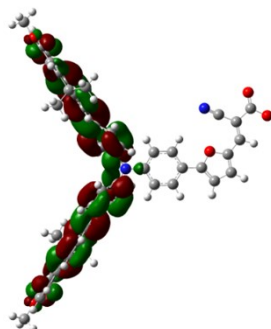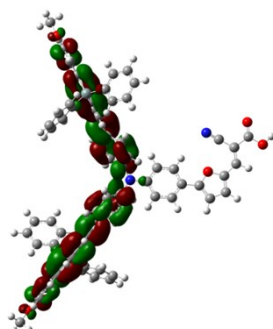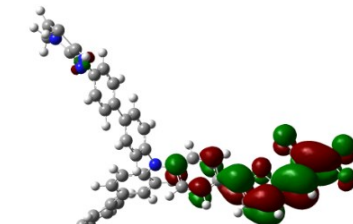

+1

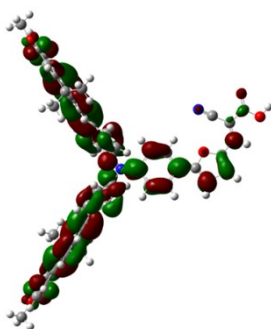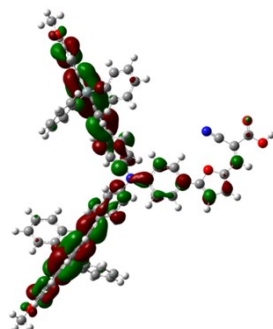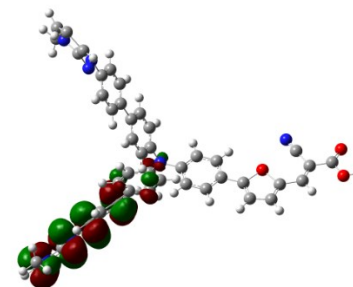

LUMO

+2

ME104

ME105

ME106

HOMO

-2

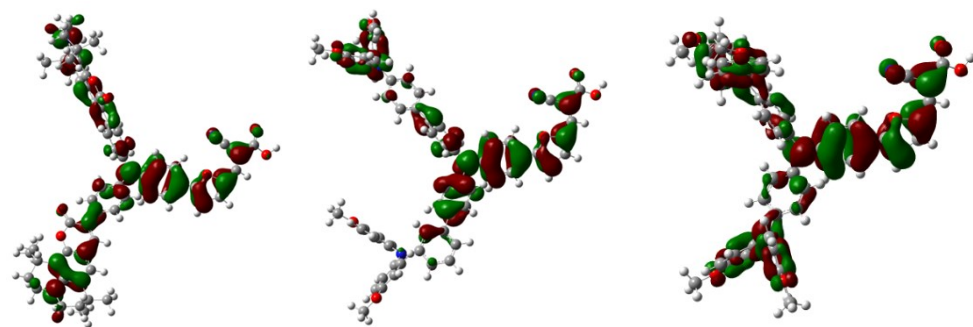

HOMO

-1

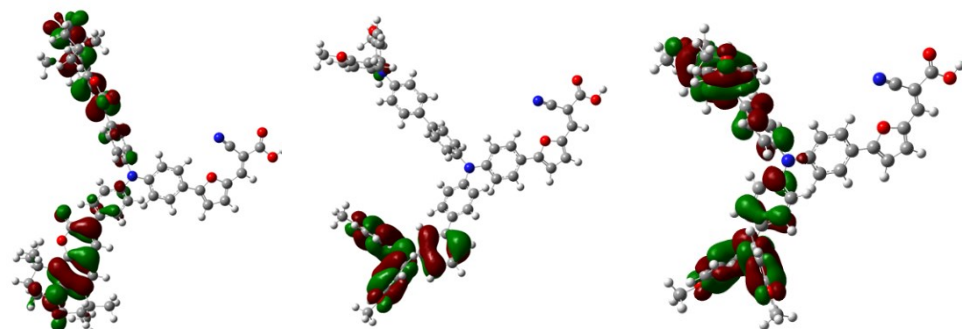

HOMO

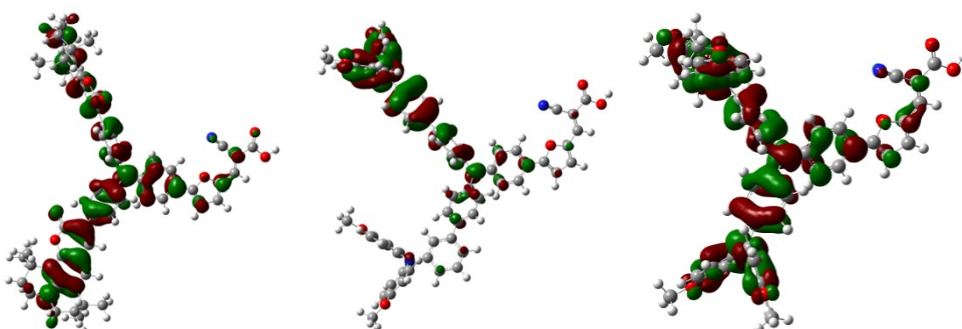

LUMO

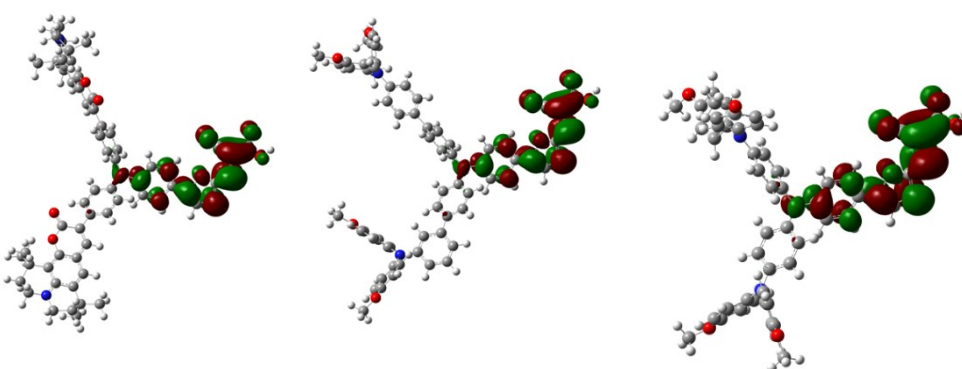

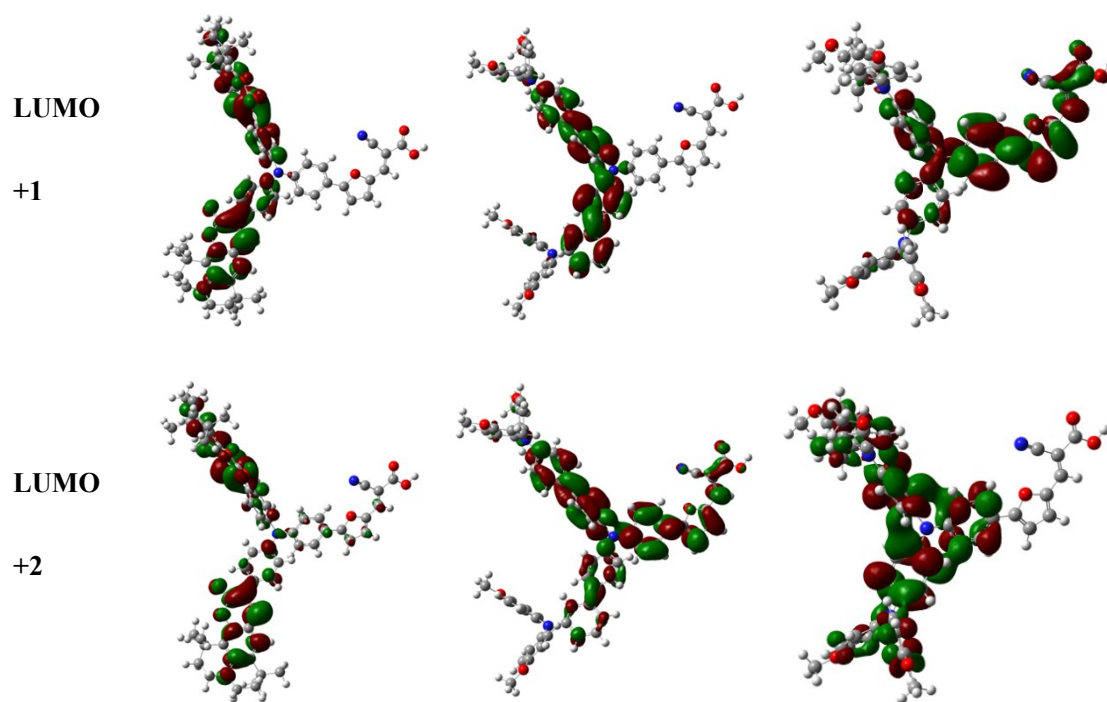

Fig. S2. Frontier molecular orbitals of ME101-ME106.

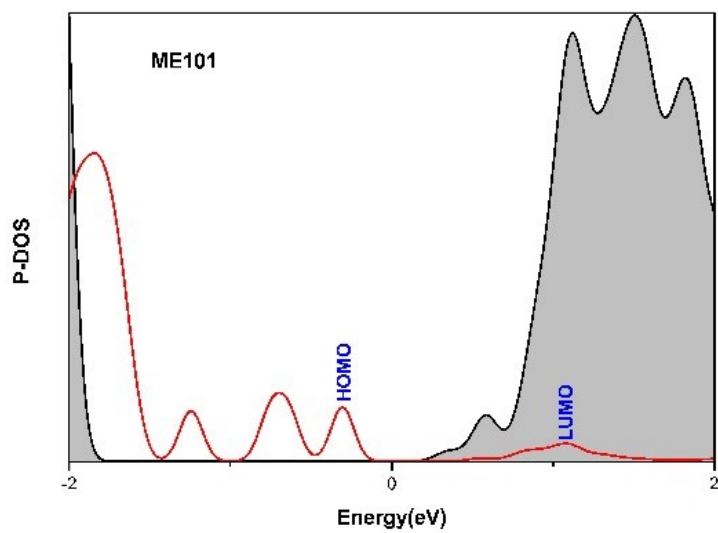

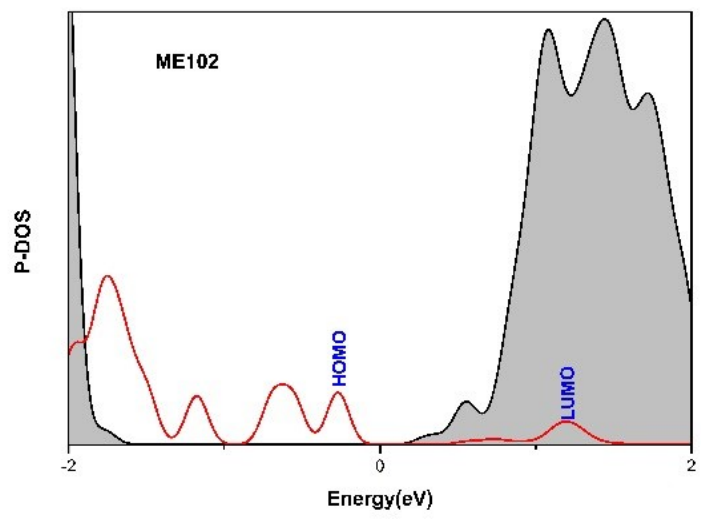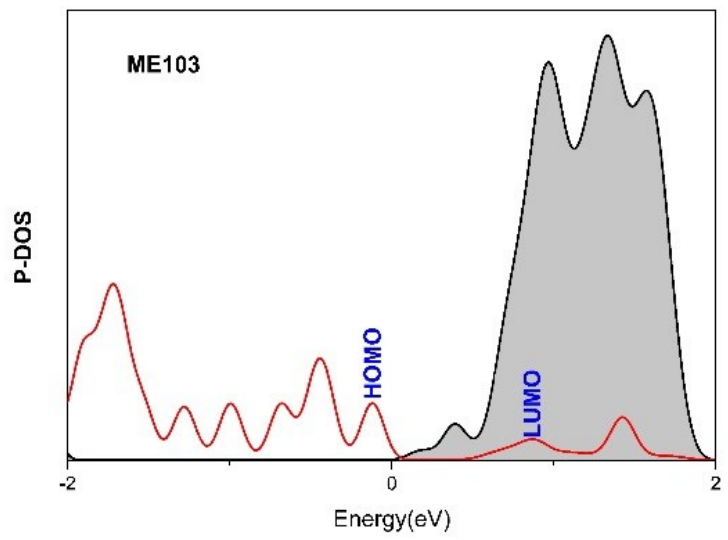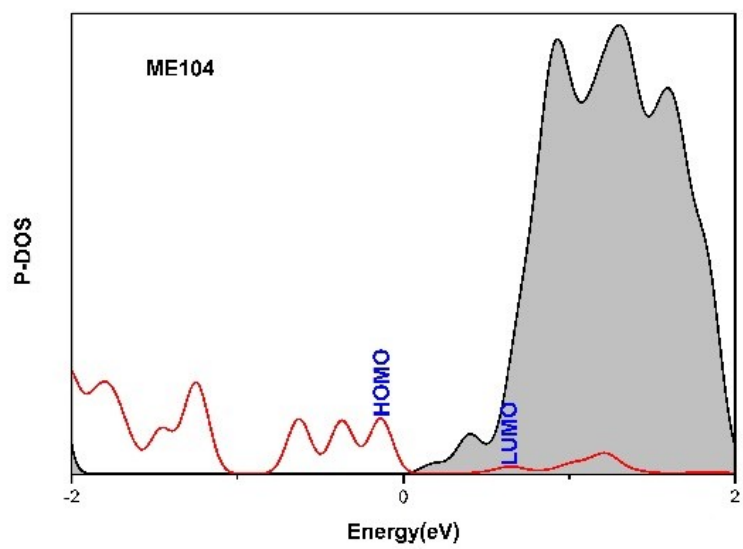

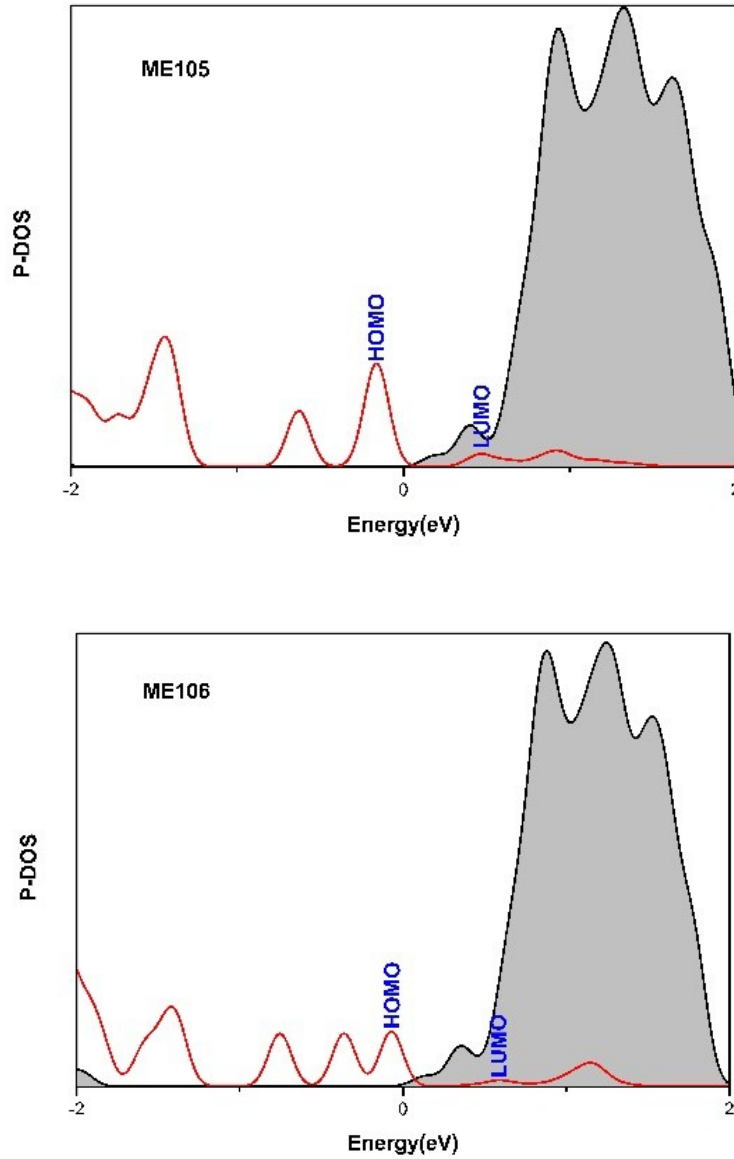

**Fig.S3** Calculated projected density of states for **ME101-ME106**. Red curves are for the dyes and the black lines are for the TiO<sub>2</sub> substrate

### Calculation Methods of Absorption Spectra

The spectrum is obtained using the following expression [1] base on the calculated excitation energies ( $\omega_i$ ) and oscillator strengths ( $f_i$ )

$$\epsilon(\omega) = 2.174 \times 10^8 \sum_i \frac{f_i}{\Delta} \exp \left[ -2.773 \frac{(\omega - \omega_i)^2}{\Delta^2} \right] \quad (1)$$

where the molar extinction coefficient is given in units of M<sup>-1</sup>cm<sup>-1</sup>, the energies  $\omega$ ,



$\omega_i$  and Gaussian full-bandwidth at half-height are expressed in  $\text{cm}^{-1}$ , and  $f_i$  is the corresponding oscillator strength. This expression satisfies the well-known relationship

$$4.32 \times 10^{-9} \int \varepsilon(\omega) d\omega = \sum_i f_i \quad (2)$$

We use  $\sigma = 4000 \text{cm}^{-1}$  for the optical band broadening to mimic thermal oscillations in dye structures and excitations at room temperature, which is very close to those in experimentally measured absorption spectra.

The molar extinction coefficients calculated from eq1 are comparable to experimentally measured ones [2] after applying an overall scaling factor of  $\sim 0.5$  for the size of the peaks.

[1] Hay, P.J. and W.R. Wadt. *J Chem Phys*, 1985. **82**(1) 270-283.

[2] Zhang, G., et al. *Chem Commun*, 2009(16): 2198-2200.
